# Supplementary material for: RNA Sequence Reveals Mouse Retinal Transcriptome Changes Early after Axonal Injury
Source: PLoS One. 2014 Mar 27;9(3):e93258. doi: 10.1371/journal.pone.0093258 (PMC3968129; doi:10.1371/journal.pone.0093258)
Supplement: Table S3 — List of DEGs after ONC. (XLSX) [file pone.0093258.s003.xlsx]

## Sheet: Sheet1
Table S3. List of DEGs after ONC.
Symbol	Description	Fold Change	P-value	FDR
1500012F01Rik	RIKEN cDNA 1500012F01 gene	1.5294	0.00713903	0.0823253
3110082D06Rik	similar to CG11212-PA	-2.04846	0.00894259	0.0869182
4632434I11Rik	RIKEN cDNA 4632434I11 gene	2.12972	0.00473742	0.0727168
8430410A17Rik	RIKEN cDNA 8430410A17 gene	1.54399	0.00313903	0.0679246
Aars	alanyl-tRNA synthetase	1.53111	0.0010125	0.0534721
Adamts1	a disintegrin-like and metallopeptidase (reprolysin type) with thrombospondin type 1 motif, 1	1.50786	0.0145608	0.0993803
Adcyap1	adenylate cyclase activating polypeptide 1	3.71882	0.000949661	0.0532634
Ager	advanced glycosylation end product-specific receptor	2.10659	0.0136009	0.0974754
Arhgef3	Rho guanine nucleotide exchange factor (GEF) 3	1.90136	0.00883457	0.0869182
Arid5a	AT rich interactive domain 5A (MRF1-like)	2.55792	7.32658e-05	0.0277789
Asns	asparagine synthetase	2.0711	0.000660938	0.0509494
Atf3	activating transcription factor 3	5.3448	7.09607e-05	0.0277789
Atf4	activating transcription factor 4	1.60537	0.000565269	0.0477401
Atf5	activating transcription factor 5	2.24149	0.00226845	0.0620009
Atg10	autophagy-related 10 (yeast)	1.50511	0.000940315	0.0532634
Atg16l2	autophagy related 16 like 2 (S. cerevisiae)	1.82103	0.00143071	0.0559995
Atxn7l2	ataxin 7-like 2	1.54755	0.00815625	0.0852307
Avil	advillin	3.24892	0.00169933	0.0585322
B230312A22Rik	RIKEN cDNA B230312A22 gene	1.50098	0.00254102	0.0635692
Bin3	bridging integrator 3	1.64731	0.0144045	0.0991963
C1qa	complement component 1, q subcomponent, alpha polypeptide	1.64475	0.00797926	0.0848302
C1qb	complement component 1, q subcomponent, beta polypeptide	1.91898	0.00165625	0.0580517
C1qc	complement component 1, q subcomponent, C chain	1.61673	0.00430682	0.0727168
Caln1	calneuron 1	-1.62014	0.0012405	0.0550187
Camk1	calcium/calmodulin-dependent protein kinase I	1.78143	0.000291216	0.0445403
Capg	capping protein (actin filament), gelsolin-like	2.46475	0.014489	0.0991963
Cars	cysteinyl-tRNA synthetase	1.88451	3.28761e-05	0.0255125
Casc1	cancer susceptibility candidate 1	1.9405	0.0144578	0.0991963
Cdk14	cyclin-dependent kinase 14	-1.51964	3.65712e-05	0.0255125
Cdkn1a	cyclin-dependent kinase inhibitor 1A (P21)	4.02996	0.000691581	0.0512816
Cdr1	Cdr1 cerebellar degeneration related antigen 1	-1.60198	0.0132072	0.0967134
Cela1	chymotrypsin-like elastase family, member 1	3.49256	0.00106992	0.0536507
Chac1	ChaC, cation transport regulator-like 1 (E. coli)	6.60835	1.43865e-05	0.0218237
Chi3l1	chitinase 3-like 1	1.59974	0.00325418	0.0691167
Chrna6	cholinergic receptor, nicotinic, alpha polypeptide 6	-2.23791	0.000130781	0.0323097
Chrnb3	cholinergic receptor, nicotinic, beta polypeptide 3	-1.89401	8.70442e-05	0.0284075
Cited4	Cbp/p300-interacting transactivator, with Glu/Asp-rich carboxy-terminal domain, 4	1.68109	0.00385992	0.0717566
Clic1	chloride intracellular channel 1	2.2357	0.00168691	0.0585169
Clic4	chloride intracellular channel 4 (mitochondrial)	1.75725	0.00157492	0.0574635
Cr1l	complement component (3b/4b) receptor 1-like	1.82682	0.00557625	0.0775333
Csrnp1	cysteine-serine-rich nuclear protein 1	2.91106	0.00619115	0.0806168
Ctnnal1	catenin (cadherin associated protein), alpha-like 1	1.81852	7.59203e-05	0.0277789
Ctxn3	cortexin 3	-2.42082	0.000361509	0.044567
Cx3cr1	chemokine (C-X3-C) receptor 1	1.52741	0.0140771	0.0986812
Cyb5rl	cytochrome b5 reductase-like	2.17534	0.00784229	0.0843059
Cyp4f16	cytochrome P450, family 4, subfamily f, polypeptide 16	1.83128	0.00431414	0.0727168
Cyp4v3	cytochrome P450, family 4, subfamily v, polypeptide 3	1.69475	0.00145616	0.0559995
D4Wsu53e	DNA segment, Chr 4, Wayne State University 53, expressed	1.53691	0.00813492	0.0851401
Ddit3	DNA-damage inducible transcript 3	2.1515	0.0015068	0.0563345
Dok3	docking protein 3	1.76162	0.000791358	0.0523747
Dok5	docking protein 5	1.94048	0.00474991	0.0727168
Dpp10	dipeptidylpeptidase 10	-1.84685	0.003604	0.0706348
Dusp1	dual specificity phosphatase 1	1.62023	0.000518773	0.0477401
Ecel1	endothelin converting enzyme-like 1	15.959	0.00107649	0.0536507
Egr1	early growth response 1	2.24818	0.000725358	0.0513831
Emid2	EMI domain containing 2	2.00526	0.00406521	0.0725068
Etnk2	ethanolamine kinase 2; similar to putative ethanolamine kinase	1.63931	0.00458276	0.0727168
Fam129a	family with sequence similarity 129, member A	2.68754	0.000230864	0.0445403
Fcer1g	Fc receptor, IgE, high affinity I, gamma polypeptide	2.08117	0.0011464	0.0536507
Fxyd1	FXYD domain-containing ion transport regulator 1	1.50052	0.00323286	0.0690667
Fxyd7	FXYD domain-containing ion transport regulator 7	-2.35332	0.000985338	0.0532634
Gap43	growth associated protein 43	1.53015	0.00443725	0.0727168
Gars	glycyl-tRNA synthetase	1.54668	0.000410595	0.044567
Gckr	glucokinase regulatory protein	1.89187	0.0106034	0.0920876
Ggct	gamma-glutamyl cyclotransferase	1.55695	0.00835845	0.0854568
Gm13889	predicted gene 13889	3.64749	9.36262e-05	0.0286396
Gm16532	predicted gene, 16532	-1.80949	0.0127829	0.0961023
Gm6747	predicted gene 6747	-3.5347	0.00216867	0.0608323
Gm7244	predicted gene 7244	-2.56894	0.00335262	0.0691167
Gpatch4	G patch domain containing 4	1.6065	0.0127635	0.0961023
Gpnmb	glycoprotein (transmembrane) nmb	1.65302	0.00857467	0.085742
Gpr27	G protein-coupled receptor 27	1.69144	0.0120009	0.0950138
Gulp1	GULP, engulfment adaptor PTB domain containing 1	1.51249	0.00146001	0.0559995
H2-K1	histocompatibility 2, K1, K region	1.57408	0.00455914	0.0727168
H2-Q4	3-hydroxyanthranilate 3,4-dioxygenase	1.64696	0.00165056	0.0580517
Hax1	HCLS1 associated X-1; silica-induced gene 111	1.64192	0.00298547	0.0667543
Hepacam	hepatocyte cell adhesion molecule	2.1589	0.0119603	0.0949791
Hmgn2	high mobility group nucleosomal binding domain 2	1.64037	0.000144591	0.0335532
Hmox1	heme oxygenase (decycling) 1	3.66792	4.82307e-05	0.0255125
Htr1b	5-hydroxytryptamine (serotonin) receptor 1B	-2.36242	0.000695446	0.0512816
Ifi30	interferon gamma inducible protein 30	1.93161	0.00982087	0.0896836
Igfbp3	insulin-like growth factor binding protein 3	2.0388	0.0111262	0.0935937
Irx2	Iroquois related homeobox 2 (Drosophila)	-2.76723	0.000368612	0.044567
Itgam	integrin alpha M	1.84411	0.0125054	0.0959013
Jun	Jun oncogene	2.00319	0.000114339	0.0307784
Kank4	KN motif and ankyrin repeat domains 4	-1.68702	0.00538186	0.0765708
Kcnd2	potassium voltage-gated channel, Shal-related family, member 2	-2.47212	0.0067794	0.0814694
Kcnj5	potassium inwardly-rectifying channel, subfamily J, member 5	-1.59997	0.00158161	0.0574635
Krcc1	lysine-rich coiled-coil 1	1.50894	0.0102623	0.0908747
Krt18	keratin 18	1.56533	0.000396968	0.044567
Krtcap3	keratinocyte associated protein 3	1.50235	0.00476175	0.0727168
Lgals3	lectin, galactose binding, soluble 3	4.22714	0.00366309	0.0706348
Lgi3	leucine-rich repeat LGI family, member 3	-1.52401	0.0019577	0.0592417
Lix1	limb expression 1 homolog (chicken)	3.20502	0.0115751	0.0945339
LOC101055680	uncharacterized LOC101055680	-1.62145	0.00830184	0.0854568
LOC101055828	protein AHNAK2-like	-1.93527	0.00206185	0.0602717
Mettl18	methyltransferase like 18	1.68085	0.0116269	0.0946406
Mmp12	matrix metallopeptidase 12	17.824	0.000279827	0.0445403
Mmp9	matrix metallopeptidase 9	-1.51263	0.000270939	0.0445403
Mthfd2	methylenetetrahydrofolate dehydrogenase (NAD+ dependent), methenyltetrahydrofolate cyclohydrolase	2.48372	0.000997259	0.0532634
Mtmr11	myotubularin related protein 11	1.55223	0.0142521	0.0989717
Naprt1	nicotinate phosphoribosyltransferase domain containing 1	2.74981	0.00207628	0.0602717
Nefh	similar to neurofilament protein; neurofilament, heavy polypeptide	-2.24468	0.000310551	0.044567
Nell2	NEL-like 2 (chicken)	-1.52313	0.00159434	0.0574635
Nrgn	neurogranin	-1.87109	0.000564875	0.0477401
Opn3	opsin 3	-2.4375	0.00363202	0.0706348
Pglyrp1	peptidoglycan recognition protein 1	2.64467	0.00830574	0.0854568
Phgdh	3-phosphoglycerate dehydrogenase	4.09065	0.000335921	0.044567
Plat	plasminogen activator, tissue	2.25846	5.63187e-05	0.0255125
Plcb1	phospholipase C, beta 1	-1.50465	0.00370127	0.0706348
Plekho1	pleckstrin homology domain containing, family O member 1	1.64386	0.00198917	0.0592417
Pou4f1	POU domain, class 4, transcription factor 1	-1.54478	0.00540969	0.0766941
Pou4f2	POU domain, class 4, transcription factor 2	-2.40192	0.00799328	0.0848452
Prmt2	protein arginine N-methyltransferase 2	1.5285	0.000781371	0.0523747
Prps1l3	phosphoribosyl pyrophosphate synthetase 1	2.78101	0.00602167	0.0799748
Psat1	phosphoserine aminotransferase 1	1.81897	0.000574615	0.0477401
Ptpn5	protein tyrosine phosphatase, non-receptor type 5	1.58588	0.000951888	0.0532634
Ptprn	protein tyrosine phosphatase, receptor type, N	1.77251	0.00149268	0.0561182
Ptrh1	peptidyl-tRNA hydrolase 1 homolog (S. cerevisiae)	2.3496	0.00254065	0.0635692
Pvalb	parvalbumin	-2.37234	0.000565679	0.0477401
Rab15	RAB15, member RAS oncogene family	1.5353	0.00949553	0.0885662
Rab3d	RAB3D, member RAS oncogene family	1.6748	0.0124491	0.0959013
Rab9b	RAB9B, member RAS oncogene family	-1.51257	0.000708684	0.0512816
Rasgrp2	RAS, guanyl releasing protein 2	-2.56539	0.000213255	0.0434888
Rbpms	RNA binding protein gene with multiple splicing	-1.6191	0.00143012	0.0559995
Rbpms2	RNA binding protein with multiple splicing 2	-2.09064	0.0018267	0.0589375
Rgs4	regulator of G-protein signaling 4	-1.52737	0.00464345	0.0727168
Rhoq	ras homolog gene family, member Q	1.78941	0.000352332	0.044567
Rhov	ras homolog gene family, member V	1.89103	0.013086	0.0965615
Riiad1	regulatory subunit of type II PKA R-subunit (RIIa) domain containing 1	1.97126	0.0024962	0.0635692
Rps6kl1	ribosomal protein S6 kinase-like 1	1.52101	0.00819659	0.0853999
Sars	seryl-aminoacyl-tRNA synthetase	1.63339	0.00130901	0.0558479
Scn1a	sodium channel, voltage-gated, type I, alpha	-1.58998	0.00137486	0.0559995
Serpinb8	serine (or cysteine) peptidase inhibitor, clade B, member 8	-1.77946	0.0063984	0.0806168
Serpinb9	serine (or cysteine) peptidase inhibitor, clade B, member 9	1.69557	0.00745034	0.0830781
Serpinf1	serine (or cysteine) peptidase inhibitor, clade F, member 1	2.48471	0.00119171	0.0545564
Sesn2	sestrin 2	1.66556	0.000847631	0.0532634
Sgpp2	sphingosine-1-phosphate phosphotase 2	-1.6888	0.00305519	0.0667543
Shmt2	serine hydroxymethyltransferase 2 (mitochondrial)	1.56629	0.00699797	0.0822181
Slc1a4	solute carrier family 1 (glutamate/neutral amino acid transporter), member 4	1.9391	0.0106412	0.0920876
Slc22a29	solute carrier family 22 (organic anion transporter), member 9	-1.52464	0.0138956	0.0985243
Slc7a1	solute carrier family 7 (cationic amino acid transporter, y+ system), member 1	2.07713	0.000666239	0.0509494
Slc7a3	solute carrier family 7 (cationic amino acid transporter, y+ system), member 3	2.70051	0.00239361	0.0634178
Slc7a5	solute carrier family 7 (amino acid transporter light chain, L system), member 5	1.79753	0.00102823	0.0534721
Slc7a7	solute carrier family 7 (cationic amino acid transporter, y+ system), member 7	1.81297	0.00259449	0.063964
Sncg	synuclein, gamma	-1.77123	0.000126887	0.0323097
Sox11	SRY-box containing gene 11	5.92253	0.000298056	0.044567
Sprr1a	small proline-rich protein 1A	23.813	5.45707e-05	0.0255125
Sqstm1	sequestosome 1	1.60976	0.000497605	0.0477401
Srxn1	sulfiredoxin 1 homolog (S. cerevisiae)	2.22361	0.000313625	0.044567
Sst	somatostatin	-2.07273	0.00397441	0.0723069
Stk32a	serine/threonine kinase 32A	1.59117	0.014372	0.0991963
Stmn4	stathmin-like 4	2.78861	7.84289e-05	0.0277789
Syt2	synaptotagmin II	-1.94699	0.00157244	0.0574635
Tac1	tachykinin 1	2.01885	0.000949712	0.0532634
Tars	threonyl-tRNA synthetase	1.53802	0.00038469	0.044567
Tbc1d10a	TBC1 domain family, member 10a	1.57635	0.00214444	0.0608323
Tes	testis derived transcript	2.57184	0.00766956	0.0832255
Th	tyrosine hydroxylase	1.51779	0.0135848	0.0974754
Tmem28	transmembrane protein 28	1.9174	0.0133327	0.0970197
Tmem43	transmembrane protein 43	1.65051	0.00487622	0.073742
Tnfrsf12a	tumor necrosis factor receptor superfamily, member 12a	3.97666	0.000484367	0.0477401
Toe1	target of EGR1, member 1 (nuclear)	1.55647	0.00347639	0.069476
Tppp3	tubulin polymerization-promoting protein family member 3	-2.55376	2.27005e-05	0.0218237
Traip	TRAF-interacting protein	1.52913	0.0114785	0.0944041
Trib3	tribbles homolog 3 (Drosophila)	2.88839	0.00298159	0.0667543
Trim45	tripartite motif-containing 45	1.5644	0.0139806	0.0986657
Trim66	tripartite motif-containing 66	2.03384	0.00759571	0.0832255
Tubb3	tubulin, beta 3 class III	-1.54209	0.00283018	0.0647827
Tusc5	tumor suppressor candidate 5	-2.26575	0.00902037	0.0869182
Tyrobp	TYRO protein tyrosine kinase binding protein	2.13712	0.0129289	0.0961031
Vamp1	vesicle-associated membrane protein 1	-1.62878	0.000279146	0.0445403
Vgf	VGF nerve growth factor inducible	1.90627	0.00268787	0.063964
Ypel4	yippee-like 4 (Drosophila)	1.73158	0.00174188	0.0588193
Zcchc12	zinc finger, CCHC domain containing 12	2.27628	0.000825216	0.0532634
Zfp641	zinc finger protein 641	1.51629	0.00117613	0.0543107
Zyx	zyxin	1.54311	0.00329764	0.0691167
Differences were considered significant when FDR was < 0.1 and |FC| was > 1.5.
